# Supplementary material
Source: PubMed Central journal article supplement (PMC4930674)
Supplement: NIHMS778453-supplement-6.pdf [file NIHMS778453-supplement-6.pdf]

Supplementary Figure S3

**A.** FID sample 1, GSM1100121

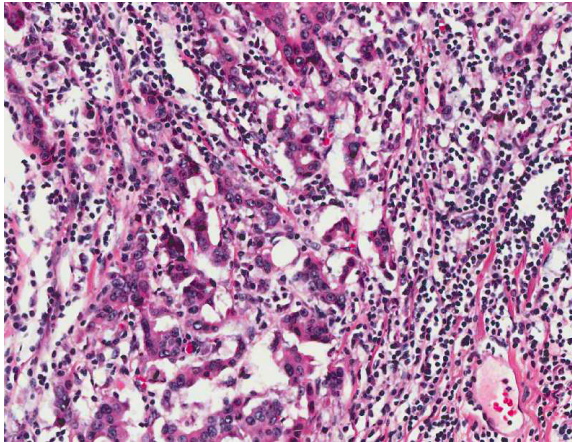

**B.** FID sample 2, GSM1100061

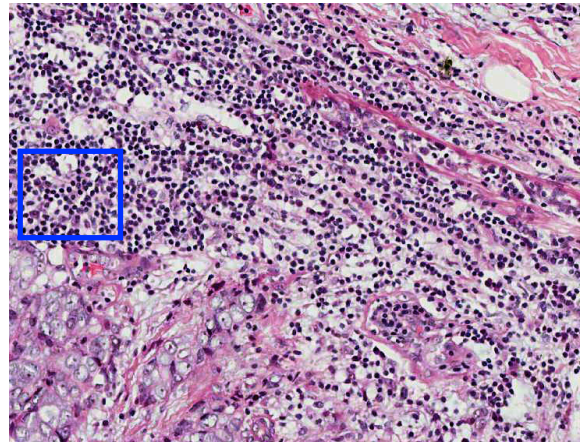

**C.** PID sample 1, GSM1100103

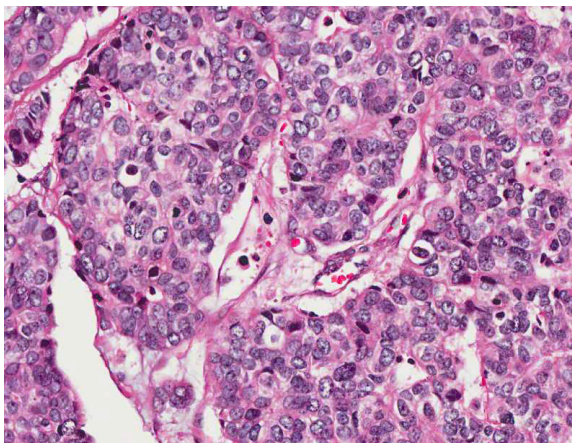

**D.** PID sample 2, GSM1100126

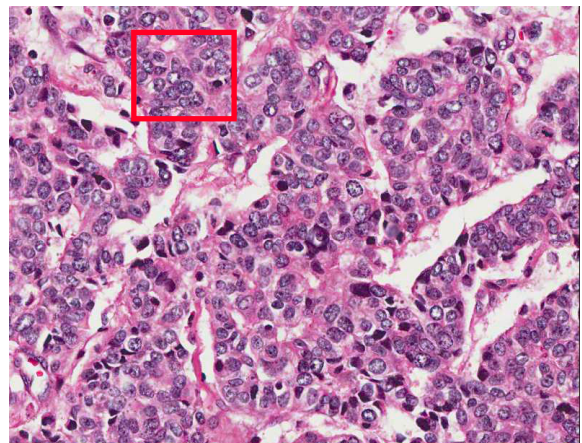

**Supplementary Figure S3. Differential abundance of immune cell infiltrate in FID and PID breast tumors.** Hematoxylin and eosin stained sections of formalin-fixed paraffin-embedded breast tumors classified by gene expression profiles as FID (**A**, **B**) and PID (**C**, **D**). Gene Expression Omnibus sample accessions (GSM numbers) are shown (parent accession: GSE45255). Blue square in (**B**) demarcates the dense immune infiltrate recognized by small darkly-stained nuclei; red square in (**D**) exemplifies the larger moderately-stained nuclei of tumor cells devoid of immune cells. Tumor sections were prepared and reviewed by T.P. (Department of Pathology, National University Hospital, Singapore).
