# Supplementary material
Source: PubMed Central journal article supplement (PMC4930674)
Supplement: NIHMS778453-supplement-7.pdf [file NIHMS778453-supplement-7.pdf]

## Supplementary Figure S4

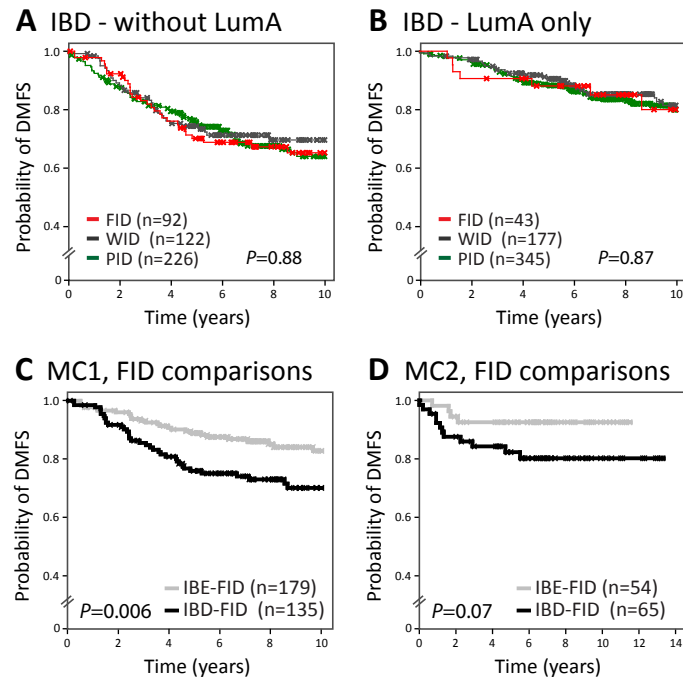

**Supplementary Figure S4. Subgroup analysis in IBE and IBD tumors.** Kaplan-Meier plots comparing the probability of DMFS of patients classified as FID, WID and PID in **(A)** non-luminal A IBD tumors, and **(B)** Luminal A IBD tumors of the MC1 cohort indicate that FID, WID and PID subclasses are not associated with DMFS in IBD Luminal A or non-Luminal A tumors. Kaplan-Meier plots comparing the probability of DMFS of patients with IBE-FID to IBD-FID breast cancer in **(C)** the MC1 cohort, and **(D)** the MC2 cohort suggest a poorer prognostic connotation for IBD-FID. Log rank p-values are reported.
