# Supplementary material
Source: PubMed Central journal article supplement (PMC4930674)
Supplement: NIHMS778453-supplement-8.pdf [file NIHMS778453-supplement-8.pdf]

**B.**

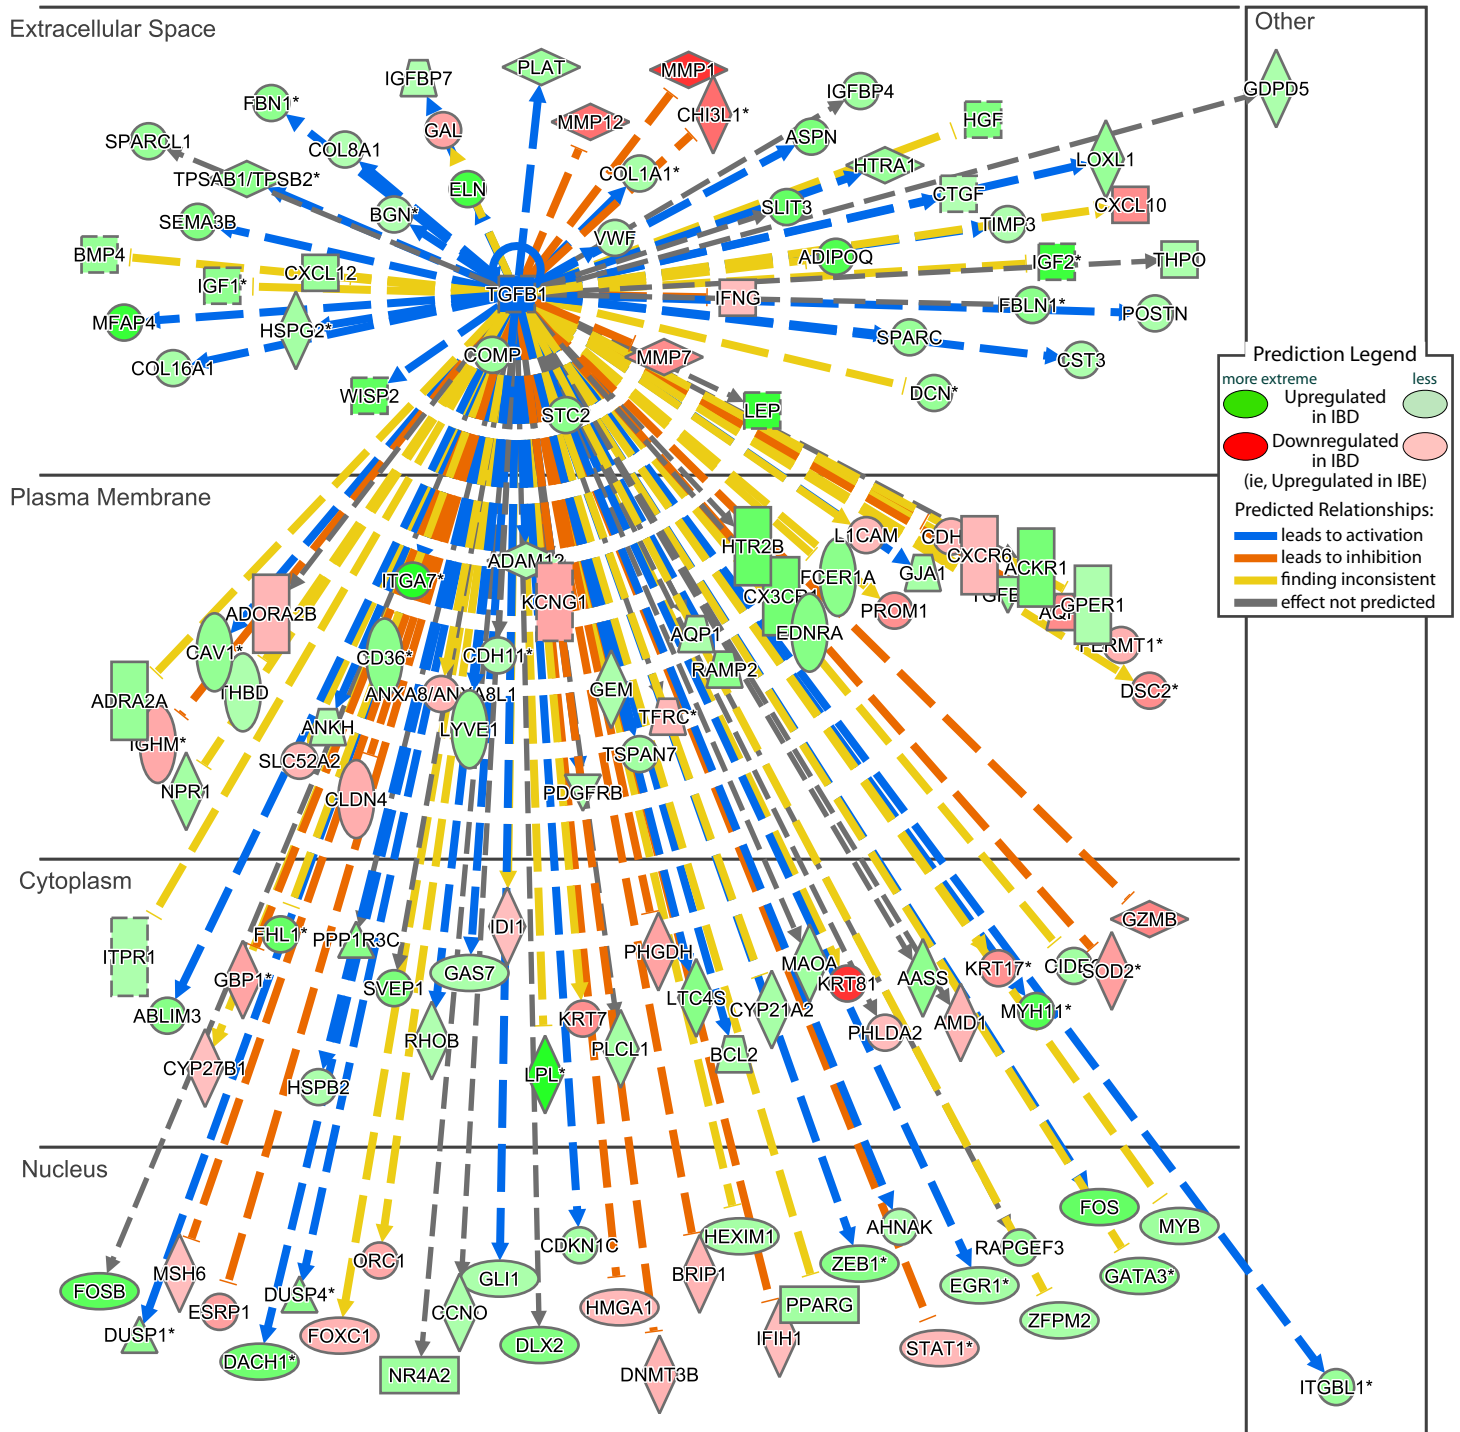

© 2000-2015 QIAGEN. All rights reserved.

**Supplementary Figure S5. IPA network schematics of regulatory pathways identified by IBE-IBD differentially expressed genes. Gene networks downstream of (A) TNF-alpha and IFN-gamma, and (B) TGF-beta are shown.**
